# Supplementary material for: Chromatin accessibility changes at intergenic regions are associated with ovarian cancer drug resistance
Source: PubMed Central journal article supplement (PMC8180030; doi:10.1186/s13148-021-01105-6), 2021-06-05
Supplement: 13148_2021_1105_MOESM1_ESM.pdf [file 13148_2021_1105_MOESM1_ESM.pdf]

## Supplementary Figure 1

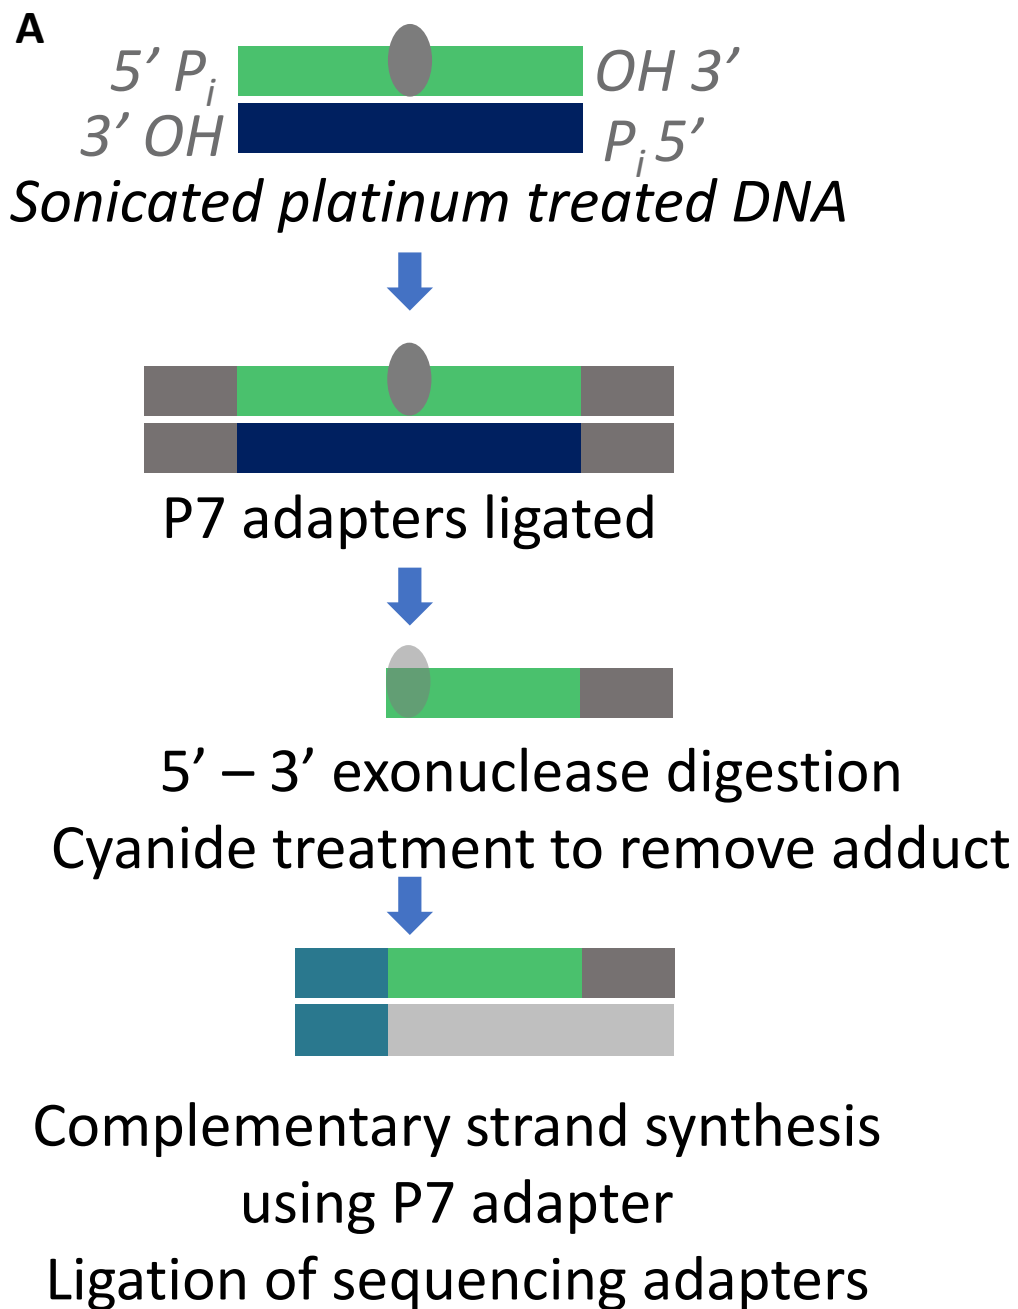

DNA isolated from cisplatin treated cells is sonicated and following P7 adapter ligation is digested with 5' to 3' lambda exonuclease with RecJF and SSB. The presence of a cisplatin adduct stops the exonuclease digestion. Following removal of the platinum adduct by cyanide treatment, complementary strands are synthesized using the P7 adapters and next generation sequencing libraries prepared.

## Supplementary Figure 2. Differential Gene expression across cell line pairs.

**A**

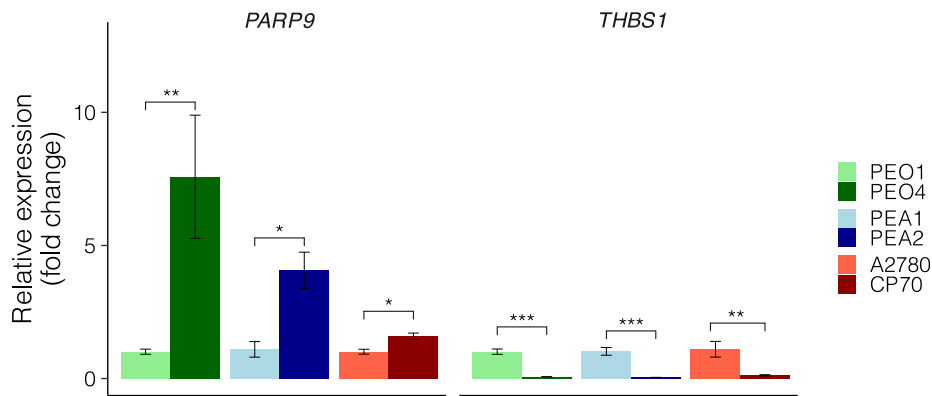

**B**

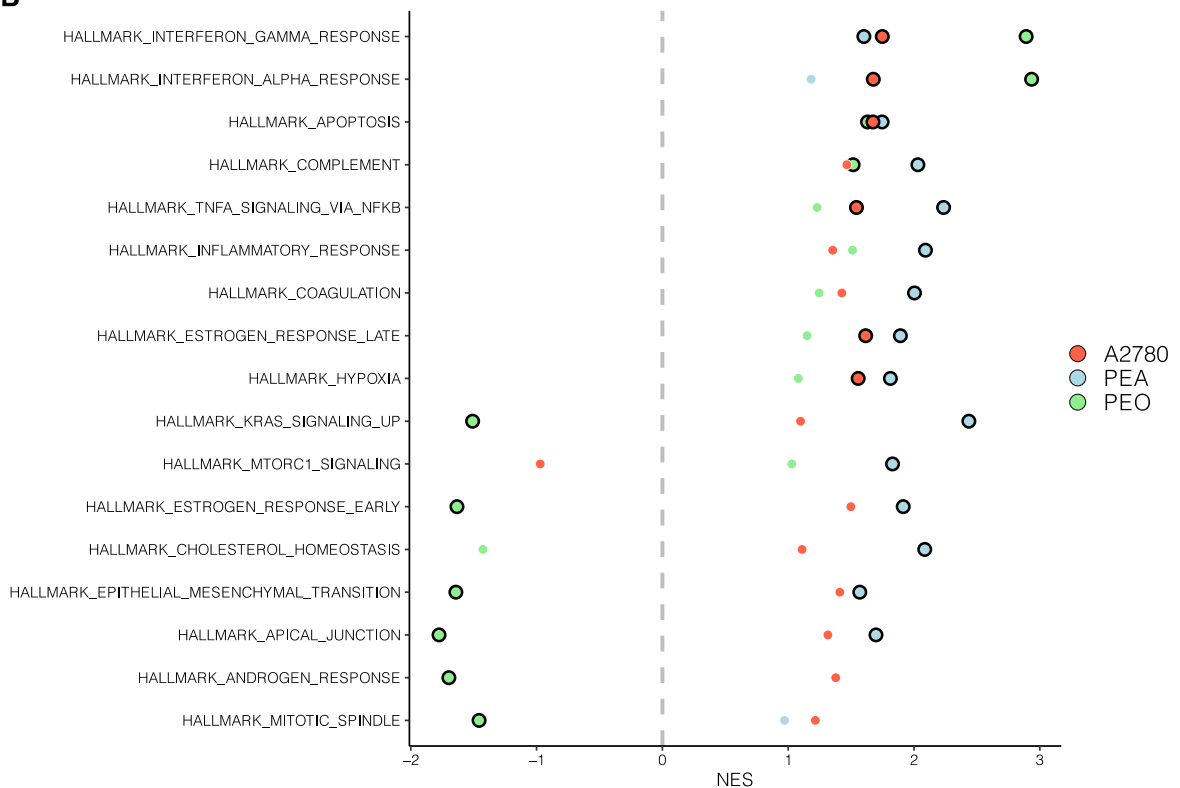

**A)** Expression of *PARP9* and *THBS1* in paired, cisplatin sensitive and resistant ovarian cancer cell lines. Relative expression was calculated by RT-QPCR from 3 biological replicates for each line. Fold change was calculated using the  $\Delta\Delta C_t$  method, using *ACTB* and *GAPDH* as housekeeping genes. Error bars show SEM. \* =  $P < 0.05$ , \*\* =  $P < 0.01$ , \*\*\* =  $P < 0.001$ . **B)** Gene set enrichment analysis using hallmark gene sets using  $t$  statistics from limma for each sensitive-resistant comparison. X axis shows normalised enrichment score. Outlines indicate a significantly altered gene set (FDR < 0.05).

Supplementary Figure 3

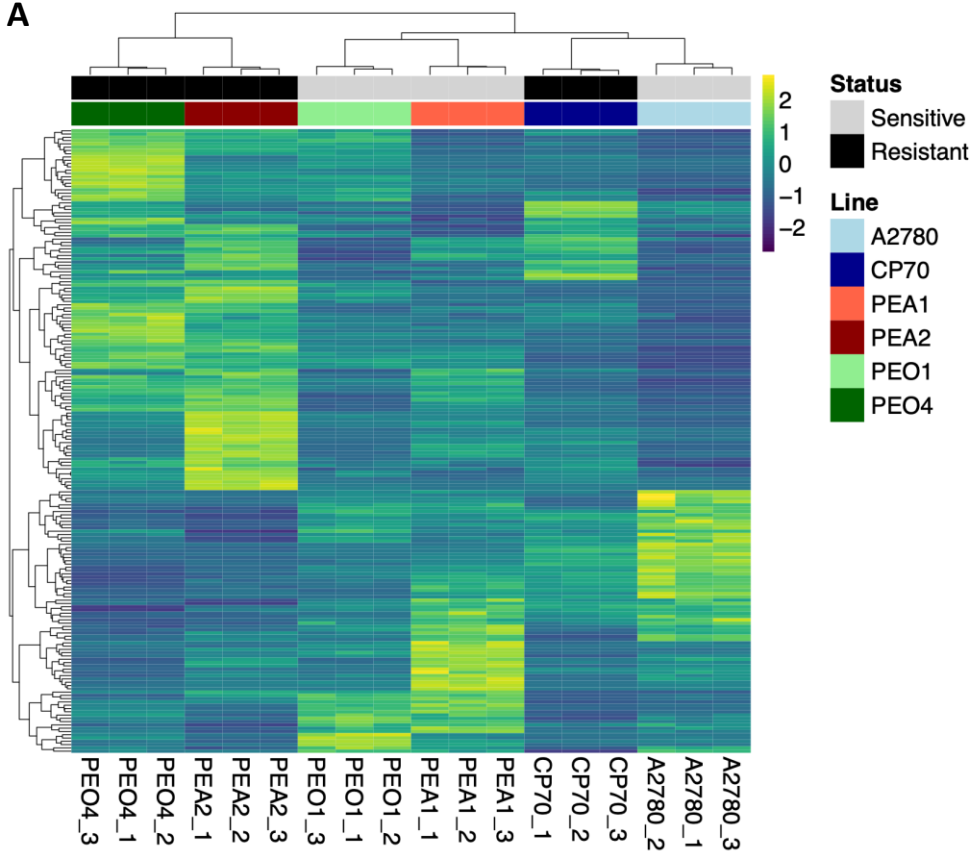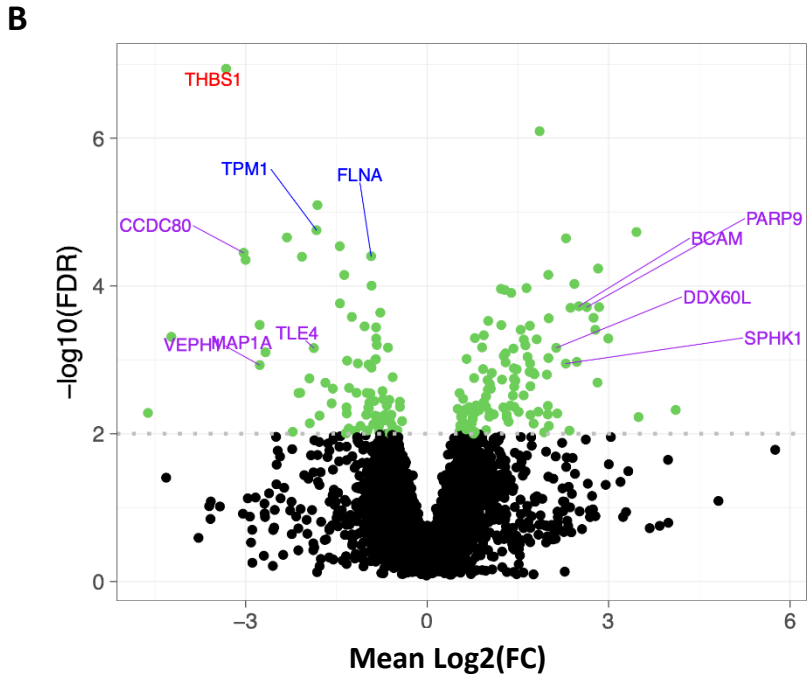

Volcano plots and heatmap of 617 DE genes as defined by rank product analysis. **A)** Heatmap of gene expression in replicate, for DE genes. Dendrogram shows relationship between samples as defined by unsupervised hierarchical clustering. **B)** Volcano plot of gene expression between sensitive and resistant lines. DE genes (FDR < 0.01) shown in green. Log<sub>2</sub>FC is mean change within each pair. Genes showing independent differential expression in all three lines labelled in purple. Genes defined as hypermethylated and downregulated in Zeller et al. 2011 labelled in blue. Genes in both the Zeller et al. 2011 set and the intersection labelled in red. Dashed lines show significance thresholds.

## Supplementary Figure 4: Example browser shots of ATACseq data at upregulated and down regulated genes

THBS1 - Downregulated

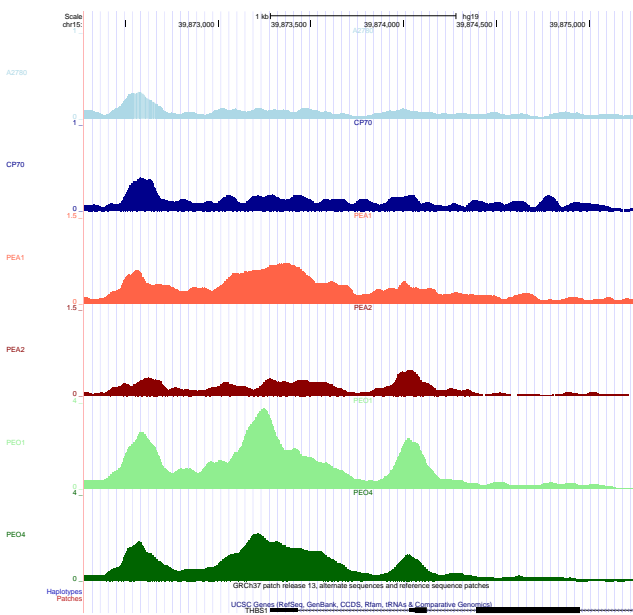

PARP9 - Upregulated

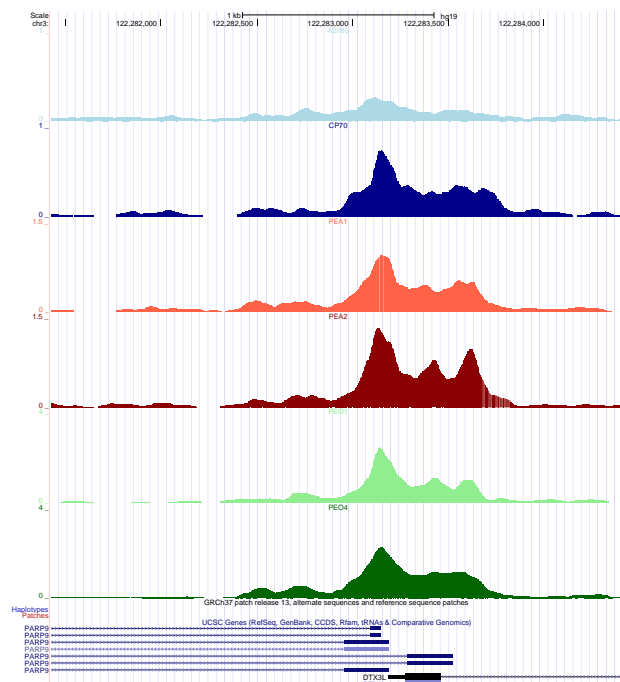

## Supplementary Figure 5. Enrichment for chromatin states in COREs lost and gained in PEO4 compared to PEO1.

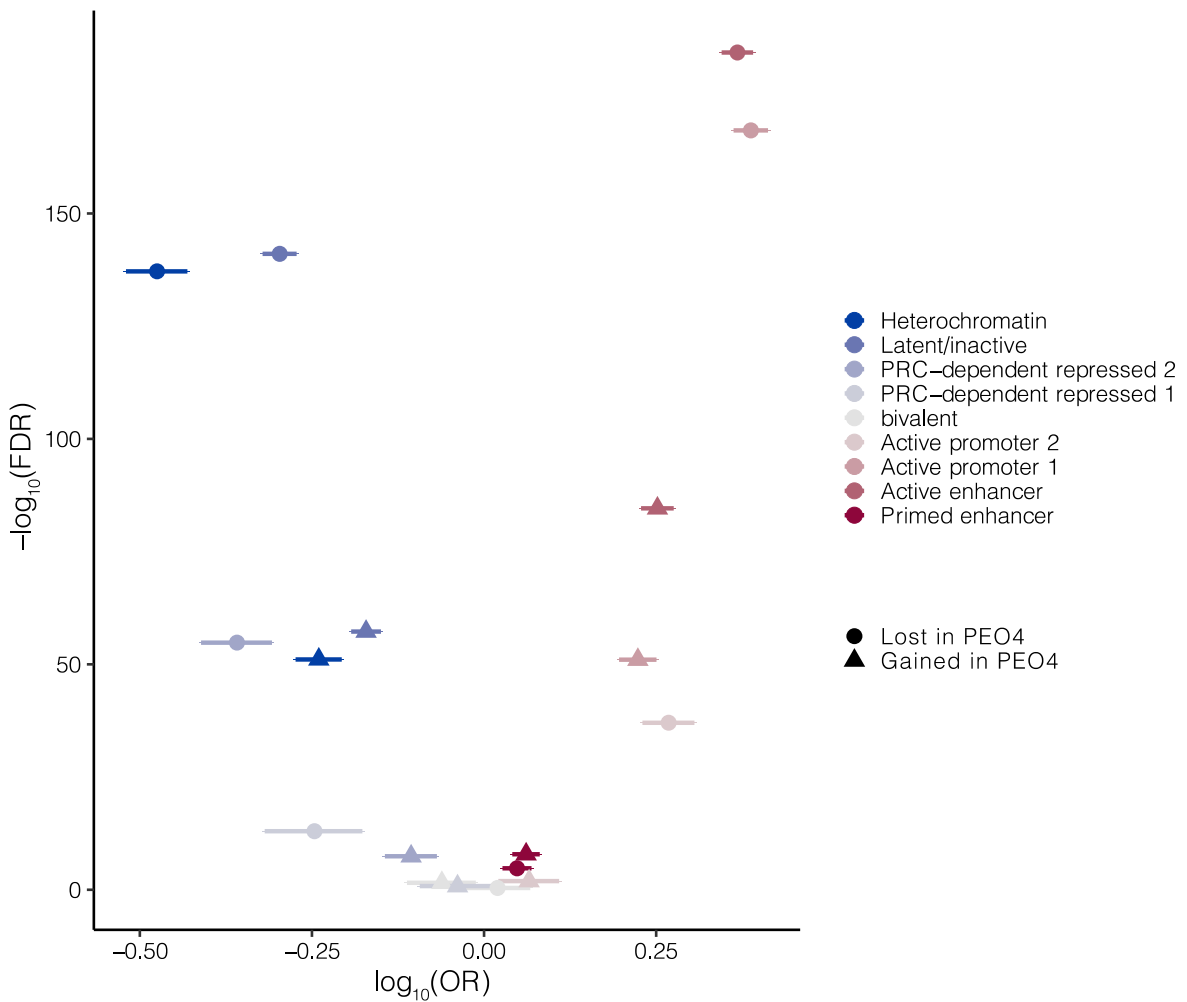

X axis shows  $\log_{10}$  odds ratio from Fisher's exact test comparing proportion of regions associated with a given chromatin state, in COREs lost/gained in PEO4 compared to PEO1, against the proportion of regions falling outside COREs which are associated with that state. Error bars show 95% confidence interval.

**Supplementary Figure 6.** Examples of COREs identified with differential accessibility  
 A. Sox9, PEO 4 versus PEO 1, B. FN1, PEA1 versus PEA2, C. AMIGO2, A2780 versus A2780/cp70

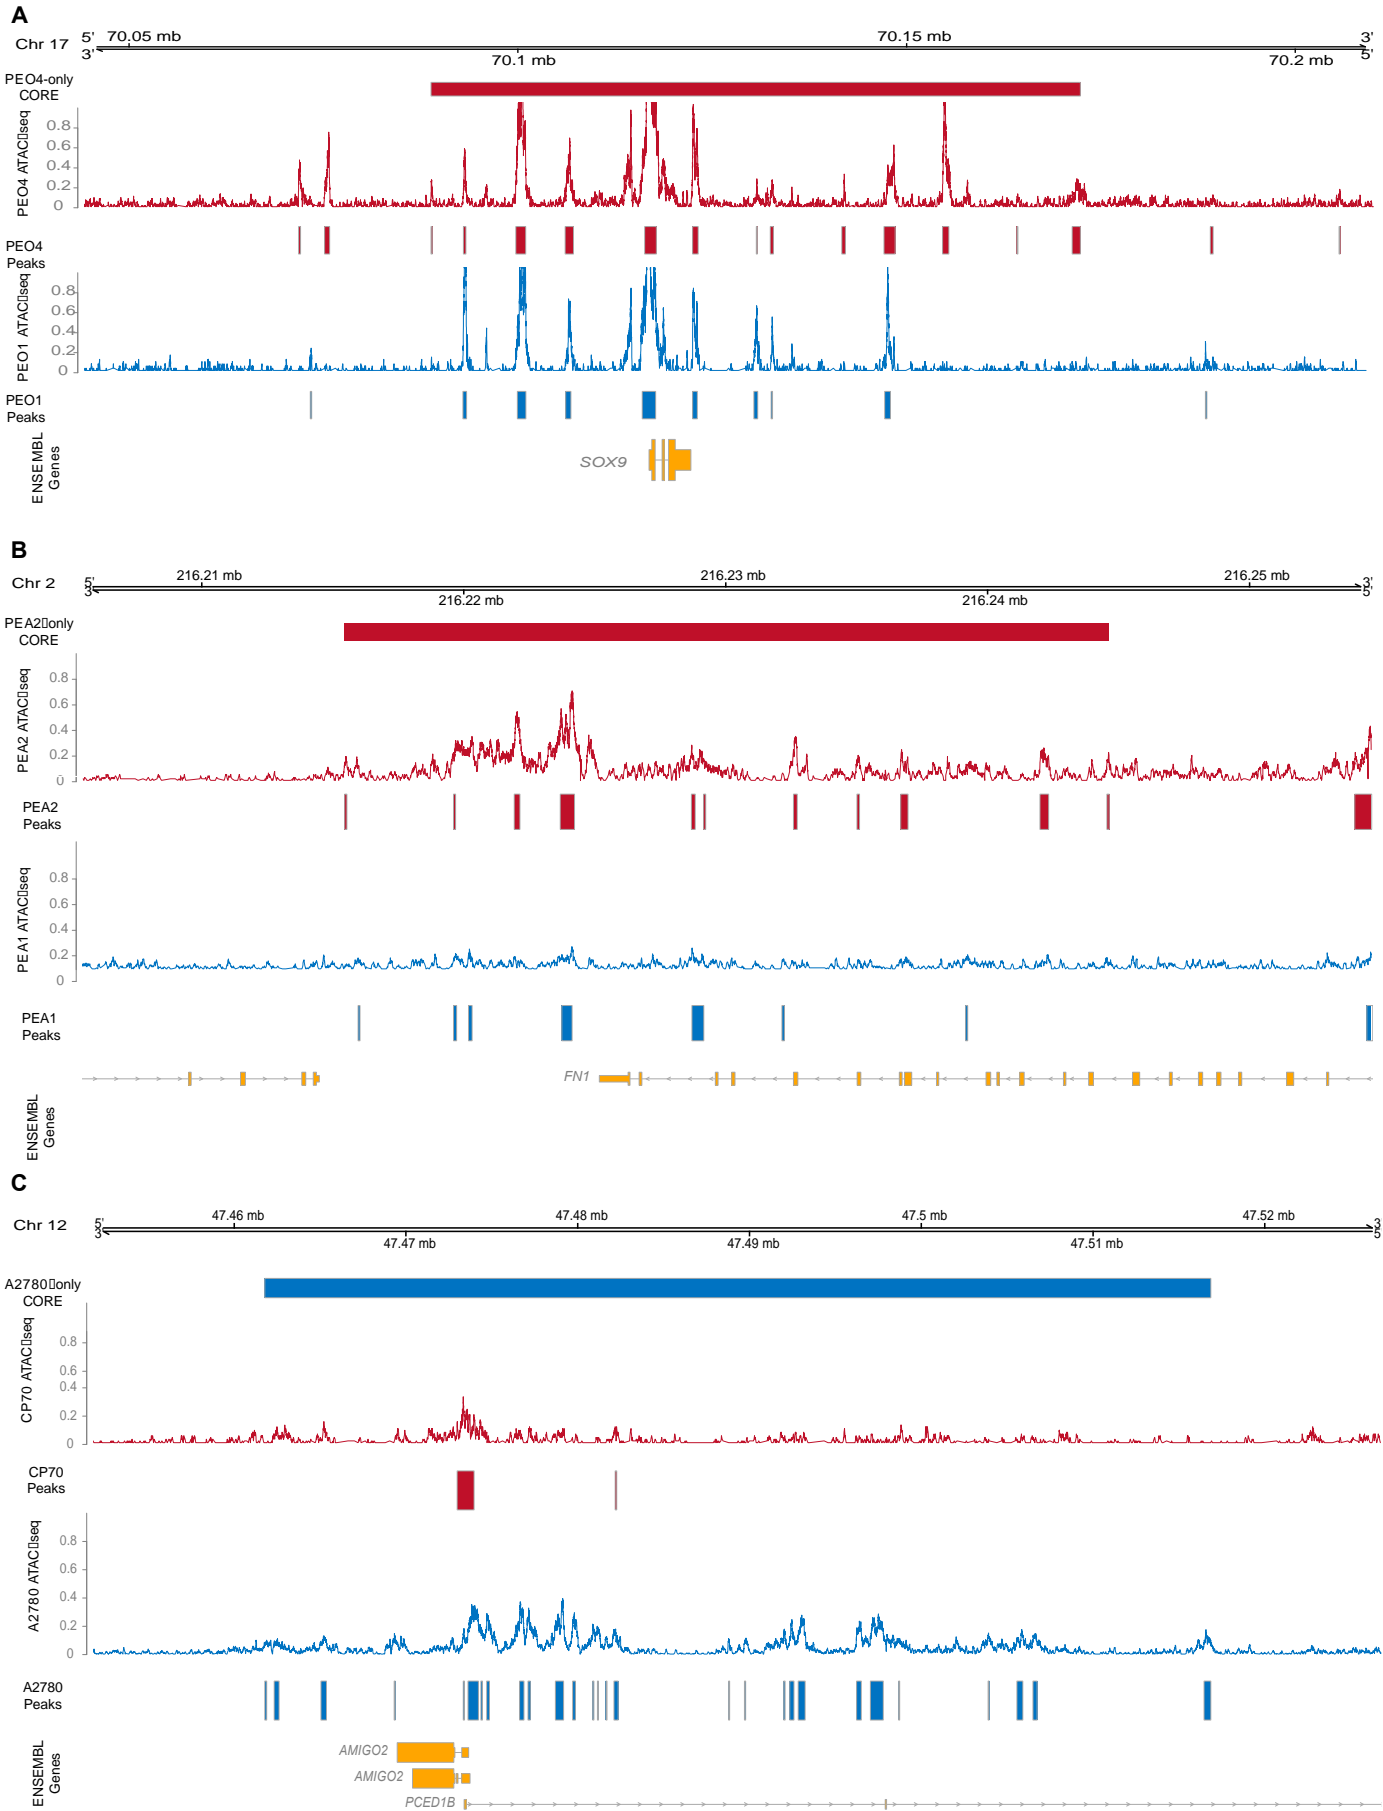

# Supplementary Figure 7

**A**

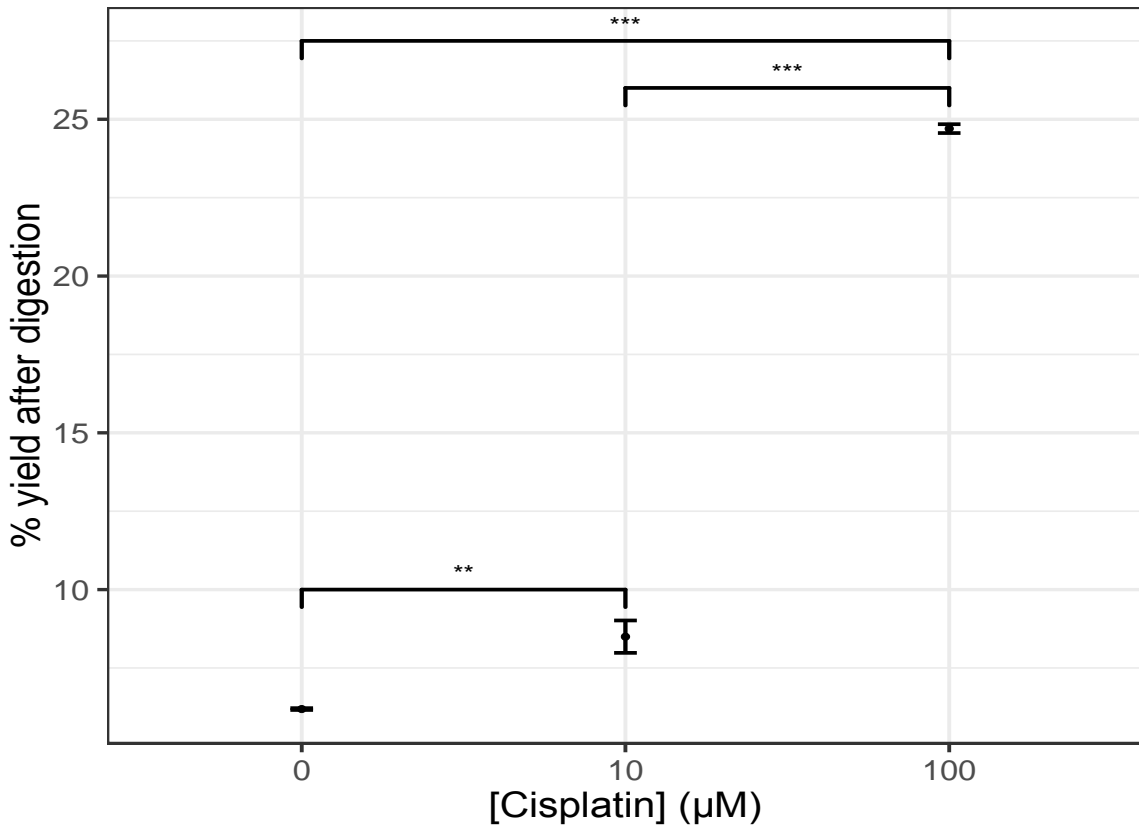

**B**

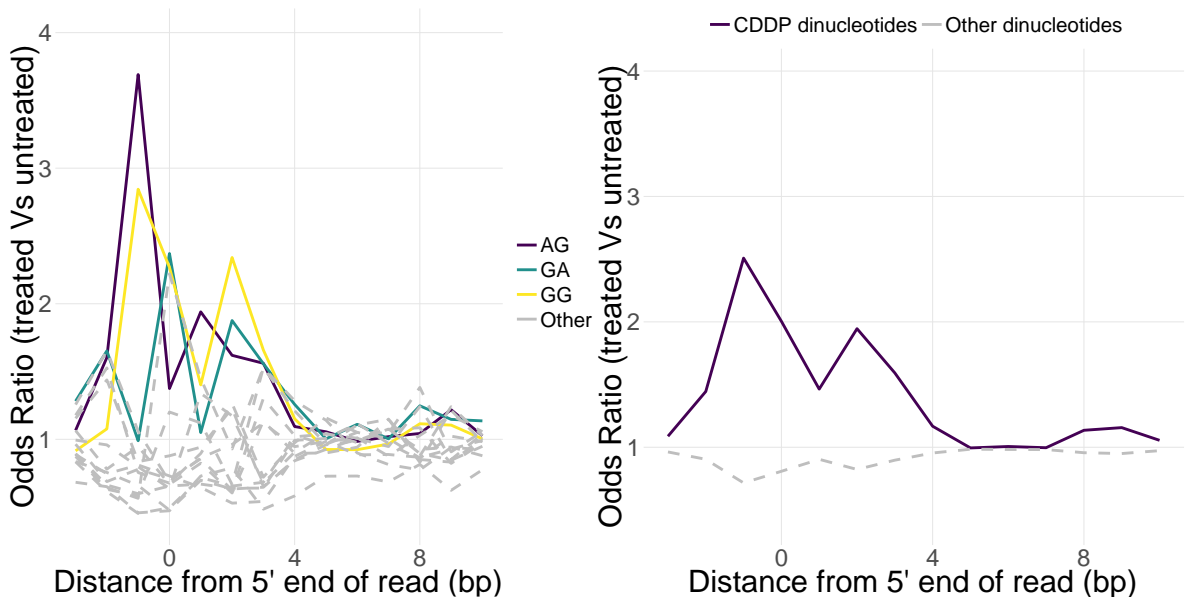

**A.** Percent yield of DNA following Exonuclease digestion of DNA isolated from A2780 cells treated with 0, 10µM and 100µM cisplatin for 5 hours (\*\* p<0.01, \*\*\*p<0.001). **B** Enrichment for platinum target purine dinucleotides at the 5' end of Pt-exo-seq reads after treatment of A2780 cells with 100µM cisplatin as Odds Ratio from Fisher Exact test.

## Supplementary Figure 8

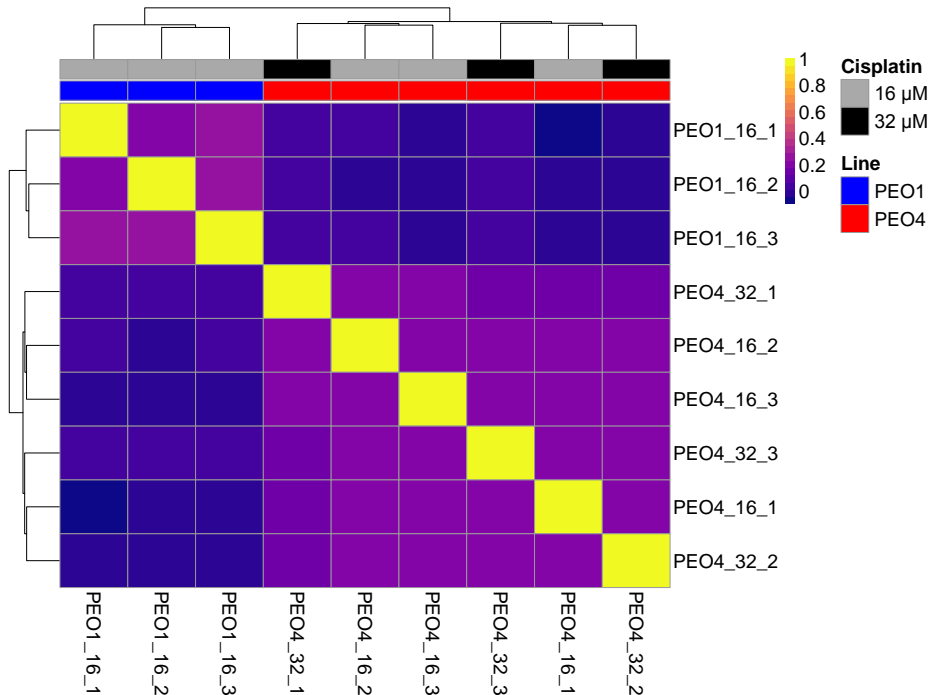

Correlation of Pt-exo-seq signal between each replicate. Heatmap shows Spearman's correlation coefficient. Dendrogram reflects unsupervised hierarchical clustering of replicates. Spearman's correlation coefficients calculated for all 61,590 1 Kb windows passing thresholds for analysis in ATAC-seq. Cells were treated for 5 hours with the indicated dose of cisplatin.



## Supplementary Figure 9

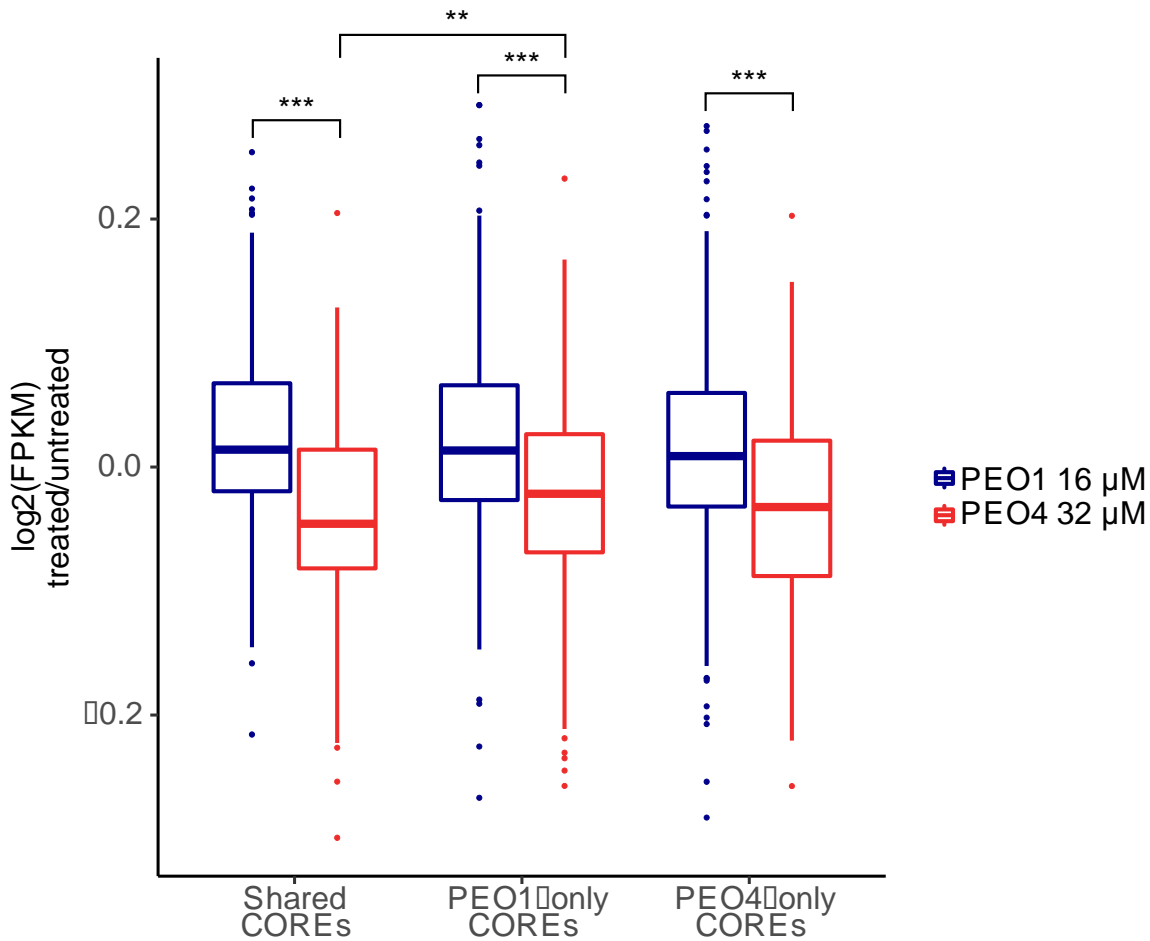

Cisplatin damage in COREs in the PEO pair. Cisplatin adduct formation, as measured by Pt-exo-seq, at COREs shared between PEO1 and PEO4 (246), COREs lost in PEO4 (480), and COREs gained in PEO4 (315). Cell lines were treated with doses shown to induce similar total genomic adducts as measured by ICP-MS (PEO1 16  $\mu\text{M}$ , PEO4 32  $\mu\text{M}$ ). Centre lines show the mean, lower and upper hinges correspond to the first and third quartiles, and whiskers extend to 1.5(IQR). Points are shown for values outside this range. \* \* =  $P < 0.01$ , \*\*\* =  $P < 0.001$ , Wilcox test.

## Supplementary Figure 10

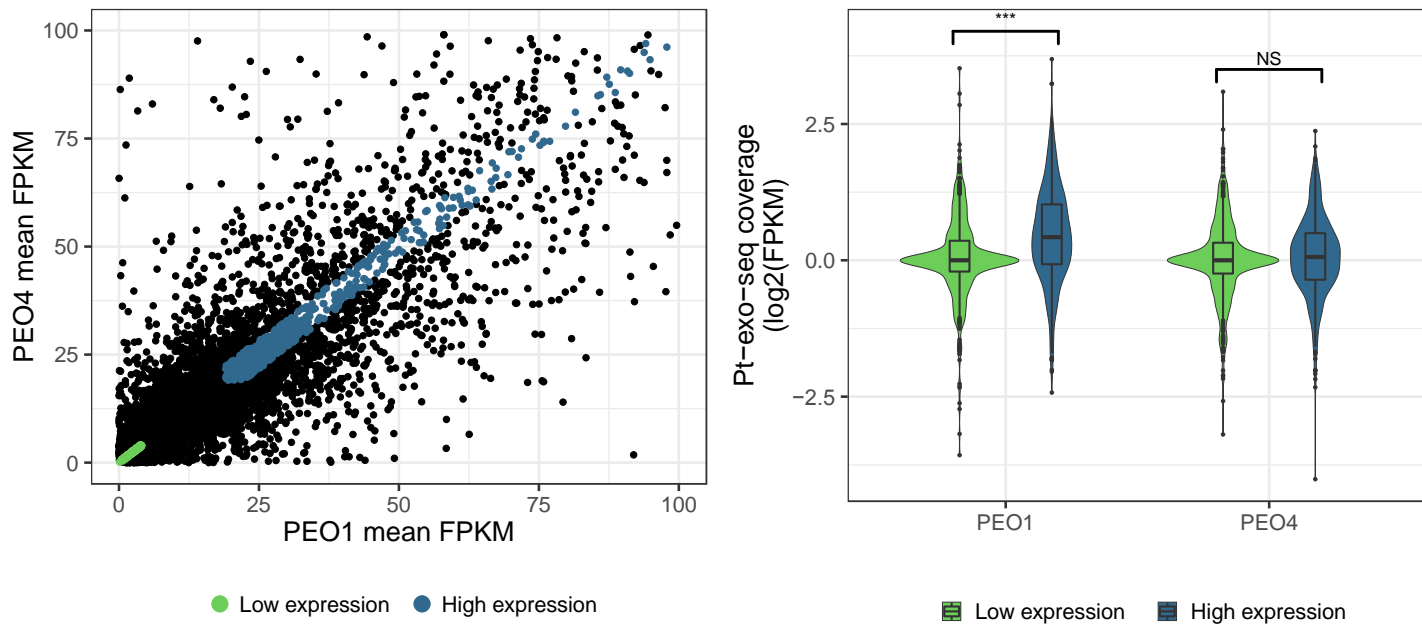

Relationship between Pt-exo-seq signal and gene expression in PEO1 and PEO4. **A)** Dot plot of gene expression in PEO1 and PEO4, showing genes selected for Pt-exo-seq coverage analysis based on equally high or low expression across lines. **B)** Pt-exo-seq signal in 2 Kb around TSS' of genes showing equally high or low expression in PEO1 and PEO4. 494 low expression genes and 557 high expression genes were used in this analysis. Genes were selected by being in the highest or lowest quartiles for both PEO1 and PEO4, with a difference in expression in lowest quartile. (\*\*\*) =  $p < 0.001$ , t test)

**Supplementary Table 1** Characteristics of cell line pairs used. Information on treatment and derivation is from the European Collection of Authenticated Cell Cultures. Fold differences in cisplatin sensitivity are from the mean of 3 reported IC<sub>50</sub> values for the A2780 and PEO pairs.

| Cell line | Derivation                                                                          | Treatment                                  | Collection                           | Average reported fold difference in platinum sensitivity | Histology | Pt DNA adduct repair | MLH1 status | BRCA1 status |
|-----------|-------------------------------------------------------------------------------------|--------------------------------------------|--------------------------------------|----------------------------------------------------------|-----------|----------------------|-------------|--------------|
| A2780     | Tumour tissue from untreated patient                                                | NA                                         | Before treatment                     |                                                          | E, CC     | ++                   | +           | WT           |
| CP70      | Derived from A2780 by exposure to increasing concentrations of cisplatin            | <i>in vitro</i> cisplatin                  | Derived from A2780                   | 9.5                                                      | E, CC     | ++                   | -           | WT           |
| PEO1      | malignant effusion, peritoneal ascites, poorly differentiated serous adenocarcinoma | cisplatin, 5-fluorouracil and chlorambucil | Before resistance                    |                                                          | HGS       | -                    | NA          | WT, LOH?     |
| PEO4      | malignant effusion, peritoneal ascites, poorly differentiated serous adenocarcinoma | cisplatin, 5-fluorouracil and chlorambucil | Post development of resistance       | 7.7                                                      | HGS       | ++                   | NA          | WT, LOH      |
| PEA1      | malignant effusion from pleural cavity, poorly differentiated adenocarcinoma        | NA                                         | Prior to cisplatin and prednimustine |                                                          | HGS       | ++                   | NA          | WT, LOH      |
| PEA2      | malignant effusion from peritoneal ascites, poorly differentiated adenocarcinoma    | Cisplatin and prednimustine                | On relapse                           | 4.7                                                      | HGS       | ++                   | NA          | WT, LOH      |

**Supplementary Table 2. The number of windows falling within each genomic class identified**

| <b>Class</b>  | <b>No.Windows</b> |
|---------------|-------------------|
| CpG           | 11500             |
| promoter-TSS  | 38565             |
| exon          | 37597             |
| intron        | 783018            |
| TTS           | 34658             |
| 3' UTR        | 25907             |
| 5' UTR        | 3822              |
| intergenic    | 1094294           |
| ERV           | 879               |
| SINE          | 430028            |
| LINE          | 701598            |
| LTR           | 293848            |
| Simple_repeat | 28442             |
| non-coding    | 13051             |

**Supplementary Table 3.** Summary of analysis of differential gene expression between each paired sensitive and resistant line. DE = ( $\log_2FC \pm 2$  and FDR  $<0.05$ ).

| <b>Pair</b> | <b>Total genes analysed</b> | <b>Total Genes DE</b> | <b>Downregulated</b> | <b>Upregulated</b> |
|-------------|-----------------------------|-----------------------|----------------------|--------------------|
| A2780       | 10,290                      | 998                   | 390                  | 608                |
| PEO         | 10,956                      | 962                   | 510                  | 452                |
| PEA         | 10,807                      | 2013                  | 920                  | 1093               |

**Supplementary Table 4** Summary of numbers of COREs called by CREAM in each line. COREs unique to a line indicate number of COREs lost or gained in the resistant line, while shared in pair are those present in both pair.

| <b>Line</b> | <b>COREs</b> | <b>Unique COREs</b> | <b>Shared in pair</b> |
|-------------|--------------|---------------------|-----------------------|
| A2780       | 1030         | 847                 | 190                   |
| CP70        | 358          | 192                 |                       |
| PEA1        | 744          | 601                 | 148                   |
| PEA2        | 811          | 667                 |                       |
| PEO1        | 715          | 480                 | 246                   |
| PEO4        | 537          | 315                 |                       |

**Supplementary Table 5** Enzymes and buffers used for Pt-exo-seq library preparation

| <b>Enzyme</b>                       | <b>Usage</b>                                    | <b>Source</b> | <b>Code</b> |
|-------------------------------------|-------------------------------------------------|---------------|-------------|
| Micrococcal Nuclease I              | Digestion of chromatin for laddering            | NEB           | M0247S      |
| Buffer 2                            | Enzymatic reactions                             | NEB           | B7002S      |
| dNTPs                               | PCR, end repair, complementary strand synthesis |               |             |
| ATP                                 | ATP dependent enzymatic reactions               | NEB           | P0756S      |
| T4 DNA polymerase                   | Blunt end generation                            | NEB           | M0203S      |
| DNA Polymerase I (Klenow fragment)  | Blunt end generation                            | NEB           | M0210S      |
| T4 Polynucleotide Kinase            | Blunt end generation                            | NEB           | M0201S      |
| T4 DNA Ligase                       | Ligation of sequencing adapters                 | NEB           | M0202S      |
| phi29 DNA Polymerase                | Nick repair following adapter ligation          | NEB           | M0269S      |
| Lambda Exonuclease                  | 5' - 3' exonuclease digestion                   | NEB           | M02062S     |
| Lambda Exonuclease Buffer           | -                                               | NEB           | B0262S      |
| RecJF Exonuclease                   | 5' - 3' exonuclease digestion                   | NEB           | M0264S      |
| Single-Stranded DNA Binding Protein | Aid digestion of single stranded DNA            | Promega       | M3011       |

**Supplementary Table 6** Sequences of oligonucleotides used in Pt-exo-seq library preparation

| Oligo name                        | 5' modification | Barcode | Sequence                                                 |
|-----------------------------------|-----------------|---------|----------------------------------------------------------|
| P7 adapter R                      | [Phos]          | -       | GTGACTGGAGTTCAGACGTGTGCTCTCCGATC                         |
| P7 adapter F                      | -               | -       | GATCGGAAGAGCACACGTCT                                     |
| P5 adapter R                      | -               | -       | AGATCGGAAGAGCG                                           |
| P5 adapter F                      | -               | -       | TACTCTTTCCCTACACGACGCTCTCCGATCT                          |
| P7 primer                         | -               | -       | GACTGGAGTTCAGACGTGTGCT                                   |
| Universal reverse primer          | -               | -       | AATGATACGGCGACCACCGAGATCTACACTCTTTCCCTACACG*A            |
| PCR Primer index 1                | -               | CGTGAT  | CAAGCAGAAGACGGCATAACGAGATCGTGATGTGACTGGAGTTCAGACGTGTGC*T |
| PCR Primer index 2                | -               | ACATCG  | CAAGCAGAAGACGGCATAACGAGATACATCGGTGACTGGAGTTCAGACGTGTGC*T |
| PCR Primer index 3                | -               | GCCTAA  | CAAGCAGAAGACGGCATAACGAGATGCCTAAGTACTGGAGTTCAGACGTGTGC*T  |
| PCR Primer index 4                | -               | TGGTCA  | CAAGCAGAAGACGGCATAACGAGATTGGTCAGTGACTGGAGTTCAGACGTGTGC*T |
| PCR Primer index 5                | -               | CACTGT  | CAAGCAGAAGACGGCATAACGAGATCACTGTGTGACTGGAGTTCAGACGTGTGC*T |
| PCR Primer index 6                | -               | ATTGGC  | CAAGCAGAAGACGGCATAACGAGATATTGGCGTGACTGGAGTTCAGACGTGTGC*T |
| PCR Primer index 7                | -               | GATCTG  | CAAGCAGAAGACGGCATAACGAGATGATCTGGTGACTGGAGTTCAGACGTGTGC*T |
| PCR Primer index 8                | -               | TCAAGT  | CAAGCAGAAGACGGCATAACGAGATTCAAGTGTGACTGGAGTTCAGACGTGTGC*T |
| PCR Primer index 9                | -               | CTGATC  | CAAGCAGAAGACGGCATAACGAGATCTGATCGTGACTGGAGTTCAGACGTGTGC*T |
| PCR Primer index 10               | -               | AAGCTA  | CAAGCAGAAGACGGCATAACGAGATAAGCTAGTGACTGGAGTTCAGACGTGTGC*T |
| PCR Primer index 11               | -               | GTAGCC  | CAAGCAGAAGACGGCATAACGAGATGTAGCCGTGACTGGAGTTCAGACGTGTGC*T |
| PCR Primer index 12               | -               | TACAAG  | CAAGCAGAAGACGGCATAACGAGATTACAAGGTGACTGGAGTTCAGACGTGTGC*T |
| PCR Primer index 13               | -               | TTGACT  | CAAGCAGAAGACGGCATAACGAGATTTGACTGTGACTGGAGTTCAGACGTGTGC*T |
| PCR Primer index 14               | -               | GGAACT  | CAAGCAGAAGACGGCATAACGAGATGGAAGTGTGACTGGAGTTCAGACGTGTGC*T |
| PCR Primer index 15               | -               | TGACAT  | CAAGCAGAAGACGGCATAACGAGATTGACATGTGACTGGAGTTCAGACGTGTGC*T |
| Illumina Library quantification F | -               | -       | AATGATACGGCGACCACCGA                                     |
| Illumina Library quantification R | -               | -       | CAAGCAGAAGACGGCATAACGA*G                                 |
